# Supplementary material
Source: PubMed Central journal article supplement (PMC3808666)
Supplement: 1308987110_pnas.201308987SI.pdf [file 1308987110_pnas.201308987SI.pdf]

# Supporting Information

Liu et al. 10.1073/pnas.1308987110

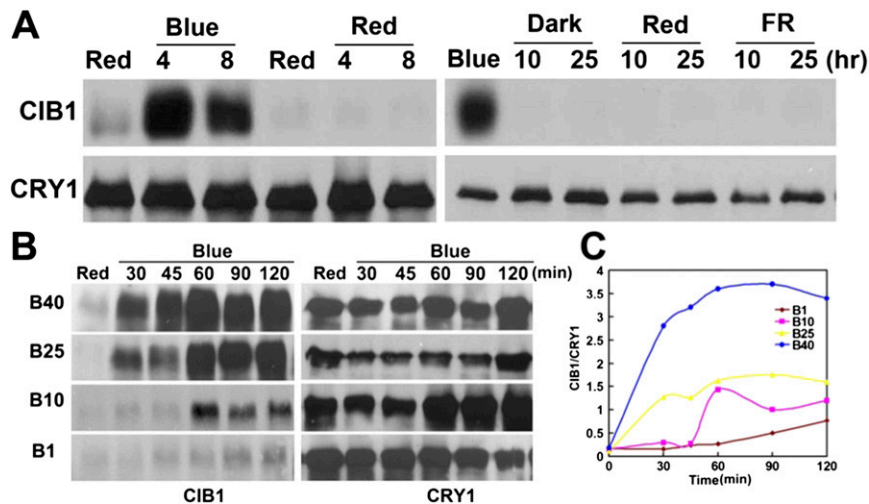

**Fig. S1.** Immunoblots showing light regulation of CRYPTOCHROME-INTERACTING basic helix–loop–helix 1 (CIB1) protein expression. (A *Left*) Transgenic plants expressing the *35S::Myc-CIB1* transgene were grown in long day (LD) for 3 wk, treated with red light (red;  $20 \mu\text{mol}\cdot\text{m}^{-2}\cdot\text{s}^{-1}$ ) for 16 h, and then transferred to blue light (blue;  $35 \mu\text{mol}\cdot\text{m}^{-2}\cdot\text{s}^{-1}$ ) or kept in red light (red;  $20 \mu\text{mol}\cdot\text{m}^{-2}\cdot\text{s}^{-1}$ ) for the indicated time. (*Right*) Alternatively, the 3-wk-old plants were first treated with blue light (blue;  $35 \mu\text{mol}\cdot\text{m}^{-2}\cdot\text{s}^{-1}$ ) for 16 h and then transferred to dark, red light ( $20 \mu\text{mol}\cdot\text{m}^{-2}\cdot\text{s}^{-1}$ ), or far-red light (FR;  $5 \mu\text{mol}\cdot\text{m}^{-2}\cdot\text{s}^{-1}$ ) for the indicated time. (B) Three-week-old red-light-grown plants were transferred to blue light of indicated fluence rate ( $1\text{--}40 \mu\text{mol}\cdot\text{m}^{-2}\cdot\text{s}^{-1}$ ) and analyzed by immunoblot. Samples were fractionated by 10% SDS/PAGE gels, blotted, probed by the anti-Myc antibody, stripped, and reprobed with the anti-cryptochrome 1 (anti-CRY1) antibody to indicate relative loading of the samples. (C) A semiquantification of CIB1 expression for the immunoblot shown in B. The ECL luminography films shown in B were scanned and analyzed by ImageJ software. The relative CIB1 expression (Myc-CIB1/CRY1) was normalized by the CRY1 loading control.

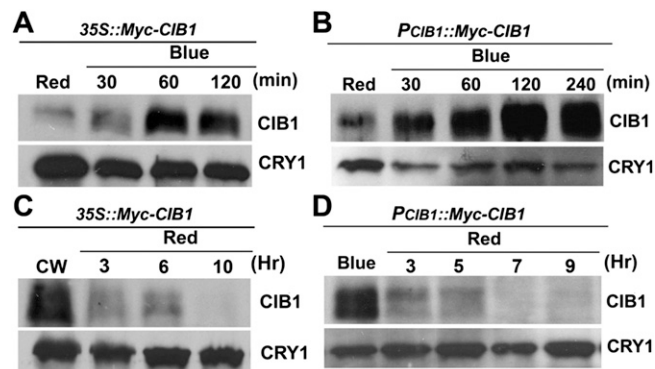

**Fig. S2.** The *CIB1* promoter is not required for the blue-light-induced CIB1 accumulation in response to blue light. Immunoblots probed with anti-Myc antibody and the control anti-CRY1 antibody are shown for the following samples. (A) Eight-day-old etiolated seedlings expressing the *35S::Myc-CIB1* transgene were transferred to red light for 16 h (red;  $20 \mu\text{mol}\cdot\text{m}^{-2}\cdot\text{s}^{-1}$ ) and then transferred to blue light (blue;  $35 \mu\text{mol}\cdot\text{m}^{-2}\cdot\text{s}^{-1}$ ) for the indicated time before sample collection. (B) Three-week-old plants expressing the *PCIB1::Myc-CIB1* transgene were grown in LD, exposed to red light (red;  $20 \mu\text{mol}\cdot\text{m}^{-2}\cdot\text{s}^{-1}$ ) for 16 h, and then transferred to blue light (blue;  $35 \mu\text{mol}\cdot\text{m}^{-2}\cdot\text{s}^{-1}$ ) for the indicated time before sample collection. (C) Eight-day-old transgenic plants expressing *35S::Myc-CIB1* transgene were grown in continuous white light (CW) and transferred to red light (red;  $20 \mu\text{mol}\cdot\text{m}^{-2}\cdot\text{s}^{-1}$ ) for the indicated time before sample collection. (D) Three-week-old plants expressing the *PCIB1::Myc-CIB1* transgene were grown in LD, exposed to blue light (blue;  $35 \mu\text{mol}\cdot\text{m}^{-2}\cdot\text{s}^{-1}$ ) for 16 h, and then transferred to red light (red;  $20 \mu\text{mol}\cdot\text{m}^{-2}\cdot\text{s}^{-1}$ ) for the indicated time before sample collection. Samples were fractionated by a 10% SDS/PAGE, blotted, probed by the anti-Myc antibody (CIB1), stripped, and reprobed with the anti-CRY1 antibody (CRY1).

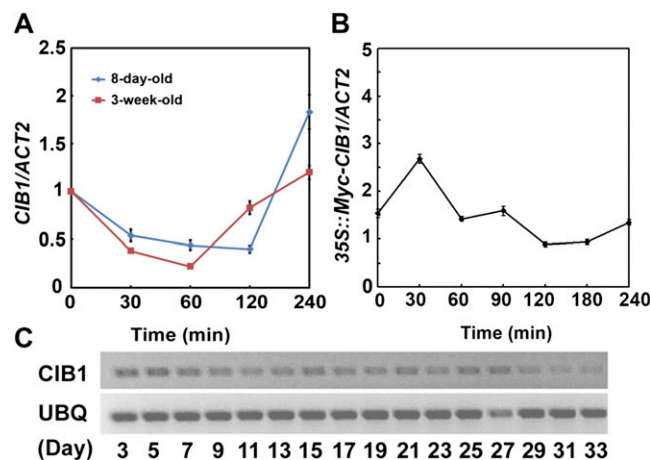

**Fig. 53.** Analyses of the *CIB1* mRNA expression. (A) Quantitative PCR (qPCR) assay showing mRNA expression of the endogenous *CIB1* gene in 8-d-old etiolated wild-type seedlings transferred to blue light ( $35 \mu\text{mol}\cdot\text{m}^{-2}\cdot\text{s}^{-1}$ ) for the indicated time before sample collection (blue) or 3-wk-old LD-grown plants, transferred to dark for 16 h, and then transferred to blue light ( $35 \mu\text{mol}\cdot\text{m}^{-2}\cdot\text{s}^{-1}$ ) for the indicated time before sample collection (red). The first point was set as 1. (B) qPCR assay showing mRNA expression of the *35S::Myc-CIB1* transgene in 5-d-old etiolated transgenic seedlings transferred to blue light ( $35 \mu\text{mol}\cdot\text{m}^{-2}\cdot\text{s}^{-1}$ ) at the indicated time before sample collection (red). (C) RT-PCR results showing mRNA expression of the *CIB1* gene in plants of different ages. Wild-type plants grown in LD were harvest every 2 d from 3 to 33 d after germination, and the mRNA level were analyzed by conventional RT-PCR. *UBQ* was used as an internal control. The result indicates that the *CIB1* mRNA is relatively low abundant and the expression is not significantly altered during development.

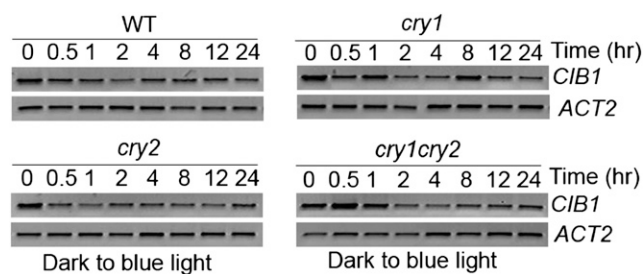

**Fig. 54.** Lack of significant change of the *CIB1* mRNA expression in the *cry* mutants. Wild-type (WT) and *cry1*, *cry2*, and *cry1cry2* mutant seedlings were grown in dark for 6 d and then transferred into blue light ( $100 \mu\text{mol}\cdot\text{m}^{-2}\cdot\text{s}^{-1}$ ) for indicated time before sample harvest for RNA analyses. Levels of mRNA expression are shown as the RT-PCR gel images. *ACT2* was used as an internal control.

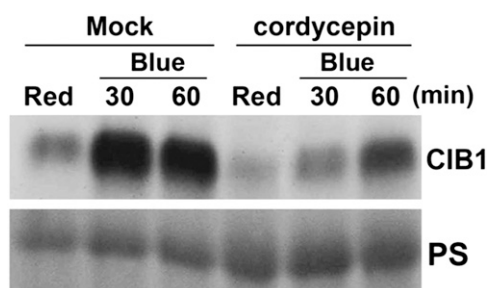

**Fig. 55.** Immunoblot showing that the transcription inhibitor cordycepin failed to block blue-light-induced increase of *CIB1* accumulation. Transgenic plants expressing *35S::Myc-CIB1* were grown in continuous white light (CW) for 3 wk and transferred to red light for 16 h. Leaves were excised and incubated in cordycepin (0.5 mmol/L) or mock solution (0.5% DMSO) in blue light ( $35 \mu\text{mol}\cdot\text{m}^{-2}\cdot\text{s}^{-1}$ ) for the indicated time before sample collection. A Ponceau S-stained band (PS) is used to indicate relative loadings.



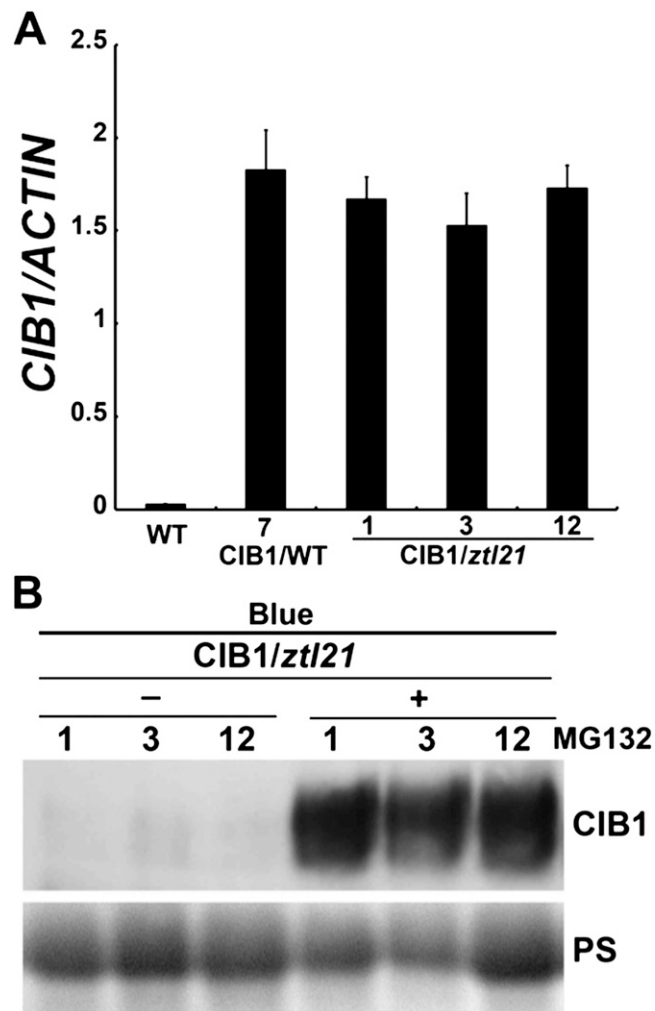

**Fig. 57.** Expression of the 35S::Myc-CIB1 transgene products in the *ztl21* mutant allele. (A) qPCR assay showing similar levels of *CIB1* mRNA expression in the transgenic plants expressing the 35S::Myc-CIB1 transgene in the wild-type (WT) and *ztl21* mutant background. SDs are shown ( $n = 3$ ). (B) Immunoblot showing that the lack of CIB1 protein accumulation in the *ztl21* mutant was caused by excessive proteolysis by the 26S proteasome. Three independent lines expressing 35S::Myc-CIB1 in the *ztl21* background were grown in LD (16-h light/8-h dark) for 3 wk and transferred to blue light ( $35 \mu\text{mol}\cdot\text{m}^{-2}\cdot\text{s}^{-1}$ ) for 16 h. Leaves were excised and incubated in MG132 (50  $\mu\text{mol/L}$ ) or mock solution (0.1% DMSO) in blue light for 3 h, and the samples were analyzed by immunoblot probed with the anti-Myc antibody. A Ponceau S-stained band (PS) is used to indicate relative loadings.

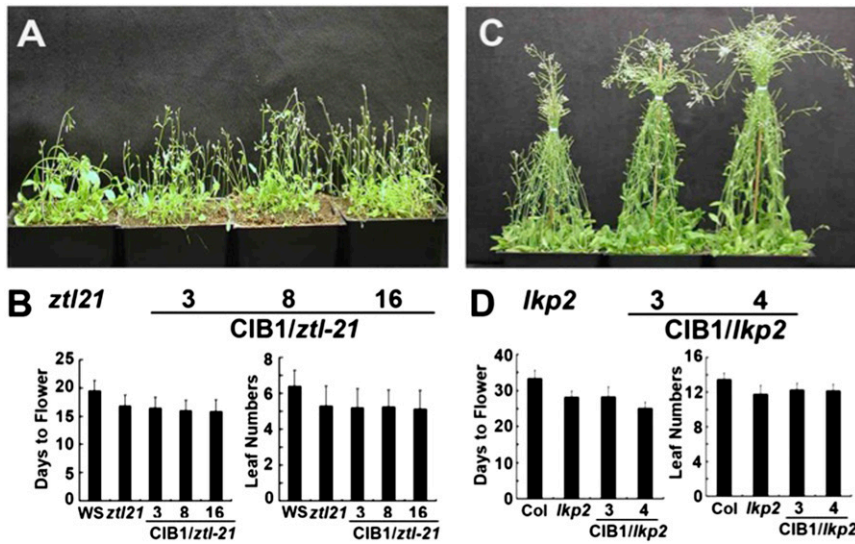

**Fig. S8.** Overexpression of CIB1 failed to cause strong accelerated flowering in the *ztl* and *lkp2* mutant backgrounds. (A and C) Images of the indicated genotype grown in LD photoperiods. (B and D) The flowering times were measured as days to flower and rosette leaf numbers at flowering of the indicated genotypes. SDs are shown ( $n > 15$ ). The expression of the *35S::Myc-CIB1* transgene in the *ztl21* (*CIB1/ztl-21*) and *lkp2* (*CIB1/lkp2*) mutants are shown in Figs. S6 and S7, respectively.

**Table S1. Oligonucleotide primers used in this work**

| Assays             | Destination products | Primer names | Primer sequences                     |
|--------------------|----------------------|--------------|--------------------------------------|
| qPCR               |                      | QACTIN2F     | 5'-GCTGAGAGATTCAGATGCCCA-3'          |
|                    |                      | QACTIN2R     | 5'-GTGGATTCCAGCAGCTTCCAT-3'          |
|                    |                      | QCIB1F       | 5'-TGATCCATTGTCATGCTTCAACA-3'        |
|                    |                      | QCIB1R       | 5'-CACATGAGAGTCCCACATCGA-3'          |
| Y2H                | pEG202-ZTL           | ZTL-attr1    | 5'-AAAAAAGCAGGCTTCATGGAGTGGGACAGTGGT |
| Co-IP              | pEarly201-ZTL        | ZTL-attr2    | 5'-AAGAAAAGCTGGGTCTTACGTGAGATAGCTCGC |
| Y2H                | pB42AD-CIB1          | CIB1-F       | 5'-GAATTCATGAATGGAGCTATAGGAG-3'      |
| Protein expression | pCold-CIB1           | CIB1-R       | 5'-CTCGAGTCAAACCTCTAAATTGCC-3'       |

Co-IP, coimmunoprecipitation. Y2H, yeast two-hybrid.
